# Supplementary material for: Safety and potential benefits of physical therapy in adult patients on extracorporeal membrane oxygenation support: a systematic review
Source: PubMed Central journal article supplement (PMC6649220; doi:10.5935/0103-507x.20190017), 2019
Supplement: rbti-31-02-0227-suppl1.pdf [file rbti-31-02-0227-suppl1.pdf]

# Safety and potential benefits of physical therapy in adult patients on extracorporeal membrane oxygenation support: a systematic review

## *Segurança e potenciais benefícios da fisioterapia em adultos submetidos ao suporte de vida com oxigenação por membrana extracorpórea: uma revisão sistemática*

Daniele da Cunha Ferreira<sup>1</sup>, Miriam Allein Zago Marcolino<sup>2</sup>, Fabrício Edler Macagnan<sup>2,3</sup>, Rodrigo Della Mèa Plentz<sup>2,3</sup>, Adriana Kessler<sup>1,3</sup>

**Table 1** - Assessing the risk of bias of cohort studies using the Newcastle-Ottawa scale

| Study                          | Selection                                |                                   |                      | Comparability                          |                                  | Outcome             |                                                      |                              |
|--------------------------------|------------------------------------------|-----------------------------------|----------------------|----------------------------------------|----------------------------------|---------------------|------------------------------------------------------|------------------------------|
|                                | Representativeness of the exposed cohort | Selection of the unexposed cohort | Analysis of exposure | Outcome of interest absent at baseline | Control for contributing factors | Analysis of outcome | Follow-up sufficiently long for the outcome to occur | Adequacy of cohort follow-up |
| Abrams et al. <sup>(11)</sup>  |                                          |                                   | *                    | *                                      |                                  | *                   | *                                                    | *                            |
| Bain et al. <sup>(19)</sup>    |                                          | *                                 | *                    | *                                      |                                  | *                   | *                                                    | *                            |
| Dennis et al. <sup>(22)</sup>  |                                          |                                   | *                    | *                                      |                                  | *                   | *                                                    | *                            |
| Hermens et al. <sup>(23)</sup> |                                          |                                   | *                    | *                                      |                                  | *                   | *                                                    | *                            |
| Keibun <sup>(24)</sup>         |                                          | *                                 | *                    | *                                      |                                  | *                   | *                                                    | *                            |
| Ko et al. <sup>(26)</sup>      |                                          |                                   | *                    | *                                      |                                  | *                   | *                                                    | *                            |
| Munshi et al. <sup>(29)</sup>  |                                          | *                                 | *                    | *                                      | *                                | *                   | *                                                    | *                            |
| Rehder et al. <sup>(34)</sup>  |                                          | *                                 | *                    | *                                      |                                  | *                   | *                                                    | *                            |
| Wells et al. <sup>(37)</sup>   |                                          |                                   | *                    | *                                      |                                  | *                   | *                                                    | *                            |

\* Score of the evaluated criterion.

**Table 2S** - Assessing the risk of bias of case series and case studies

| Study                             | 1         | 2   | 3  | 4   | 5         | 6         | 7   | 8   | 9   | 10        | 11        | 12        | 13        | 14  | 15  | 16  | 17  | 18  |
|-----------------------------------|-----------|-----|----|-----|-----------|-----------|-----|-----|-----|-----------|-----------|-----------|-----------|-----|-----|-----|-----|-----|
| Carswell et al. <sup>(20)</sup>   | Yes       | PD  | No | PD  | Uncertain | Yes       | Yes | No  | PD  | Uncertain | Uncertain | No        | Uncertain | No  | No  | Yes | PD  | No  |
| Cork et al. <sup>(21)*</sup>      | Yes       | Yes | No | PD  | NA        | NA        | Yes | No  | PD  | Uncertain | Uncertain | No        | Yes       | NA  | NA  | No  | Yes | Yes |
| Kikukawa et al. <sup>(25)*</sup>  | Yes       | Yes | No | PD  | NA        | NA        | Yes | No  | PD  | Uncertain | Uncertain | No        | Yes       | NA  | NA  | Yes | Yes | Yes |
| Kulkarni et al. <sup>(27)*</sup>  | Yes       | Yes | No | PD  | NA        | NA        | Yes | Yes | PD  | Uncertain | Uncertain | No        | Yes       | NA  | NA  | Yes | Yes | No  |
| Morris et al. <sup>(28)*</sup>    | Uncertain | PD  | No | PD  | NA        | NA        | Yes | No  | PD  | Uncertain | Uncertain | Yes       | No        | NA  | NA  | Yes | PD  | No  |
| Norrenberg et al. <sup>(30)</sup> | Yes       | PD  | No | PD  | Yes       | Uncertain | Yes | No  | Yes | Uncertain | Uncertain | Yes       | Uncertain | Yes | Yes | Yes | PD  | No  |
| Pastva et al. <sup>(31)*</sup>    | Yes       | PD  | No | PD  | NA        | NA        | Yes | No  | Yes | Uncertain | Uncertain | Yes       | No        | NA  | NA  | Yes | PD  | No  |
| Pruijsten et al. <sup>(32)</sup>  | Uncertain | Yes | No | Yes | Yes       | Yes       | Yes | No  | PD  | Uncertain | Uncertain | No        | Yes       | Yes | No  | Yes | Yes | Yes |
| Rahimi et al. <sup>(33)</sup>     | Yes       | Yes | No | No  | Uncertain | Yes       | Yes | Yes | Yes | Yes       | Uncertain | Uncertain | Yes       | Yes | No  | Yes | Yes | Yes |
| Salam et al. <sup>(35)*</sup>     | Yes       | Yes | No | PD  | NA        | NA        | Yes | Yes | PD  | Uncertain | Uncertain | No        | Yes       | NA  | NA  | Yes | Yes | No  |
| Turner et al. <sup>(36)</sup>     | Yes       | Yes | No | Yes | Uncertain | Yes       | Yes | Yes | Yes | Uncertain | Uncertain | Uncertain | Yes       | Yes | No  | Yes | Yes | No  |

1 - Was the objective/hypothesis clearly reported?; 2 - Were the characteristics of the participants described?; 3 - Were the cases collected in more than one center?; 4 - Were the eligibility (for example, inclusion and exclusion) criteria clearly stated?; 5 - Were participants recruited consecutively?; 6 - Did participants enter the study at a similar disease stage?; 7 - Was the intervention of interest clearly described?; 8 - Were additional interventions (cointerventions) reported in the study?; 9 - Were the outcome measures defined a priori?; 10 - Were the relevant outcomes evaluated using appropriate objective and/or subjective criteria?; 11 - Were the statistical tests used to assess the outcomes of interest appropriate?; 12 - Were the relevant outcomes assessed before and after the intervention?; 13 - Was the duration of follow-up reported?; 14 - Were follow-up losses reported?; 15 - Did the study present variability estimates of the analyzed data for the relevant outcomes?; 16 - Were adverse events correlated with the reported intervention?; 17 - Were the conclusions supported by the results?; 18 - Were conflicts of interest and sources of funding reported? PD - partially described; NA - not applicable. \* Study with only one case report.
